# Supplementary material for: The Long-Term Effects of High-Fat and High-Protein Diets on the Metabolic and Endocrine Activity of Adipocytes in Rats
Source: MDPI journal article supplement (doi:10.3390/biology10040339), 2021-04-17
Supplement: s1 [file s1]

## Supplementary

**Table S1.** Content of adipokines in white adipose tissue (Pt-peritesticular; Sc-subcutaneous) and rat pancreas (Pc) on standard (SD), high protein (HPD), and high fat (HFD) diets on 60 and 120 days.

| Parameter          | SD         | 60 d<br>HPD | HFD        | SD         | 120 d<br>HPD | HFD         |
|--------------------|------------|-------------|------------|------------|--------------|-------------|
| Leptin Pt (ng/g)   | 35.8±4.5   | 29.7±3.3    | 55.3±16.2  | 54.9±8.2   | 36.7±7.2*a   | 101.3±18.1a |
| Leptin Sc (ng/g)   | 20.4±4.4   | 18.4±5.0    | 23.4±2.2   | 36.8±8.6   | 31.0±5.2a    | 72.0±10.1*a |
| Resistin Pt (ng/g) | 120.7±11.3 | 83.3±7.0*   | 102.5±22.5 | 52.5±11.3  | 51.1±3.4     | 45.0±9.5    |
| Resistin Sc (ng/g) | 34.6±7.0   | 28.1±9.2    | 30.9±4.6   | 25.7±6.6   | 4.8±0.8*a    | 11.6±1.3*a  |
| Resistin Pc (ng/g) | 0.49±0.13  | 0.73±0.18*a | 0.36±0.08a | 0.17±0.04  | 0.45±0.13*   | 0.28±0.14   |
| Visfatin Pt (ng/g) | 112.4±4.4  | 141.5±14.3  | 130.5±7.3  | 129.9±12.7 | 127.4±6.5    | 136.0±7.4   |
| Visfatin Sc (ng/g) | 165.9±28.1 | 146.2±10.6  | 168.1±14.7 | 196.3±24.9 | 193.7±34.1   | 193.7±39.9  |

In the table are given arithmetic means ± SEM for n = 8; statistically significant differences ( $p < 0.05$ ) between the experimental groups and the corresponding control are marked in rows by \*, whereas between the experimental groups are marked by this same letter (a).

## Method

### Adipokines content in tissues

Tissues fragments obtained from rats were homogenized (using OMNI TISSUE HOMOGENIZER (TH)) in lysis buffer containing 20 mM Tris (pH 8.0), 137 mM NaCl, 10% glycerol, 1% Nonidet P-40, 10 mM ethylenediaminetetra acetic acid, 100 mM NaF, 1 mM phenylmethylsulfonylfluoride, 0.25 TIU/ml aprotinin, and 10 mg/ml leupeptin. Then samples were incubated on ice for 20 minutes. After this time samples were centrifuged at 14 000 × g for 15 minutes at 4°C. The supernatant was kept in ultra-freezer (-80°C) for future analysis. The levels of resistin and leptin were determined using kits described in the main part of the manuscript. Visfatin content was determined using Visfatin EIA Kit - (cat. no. EIA-VIS-1, RayBiotech Life, USA).

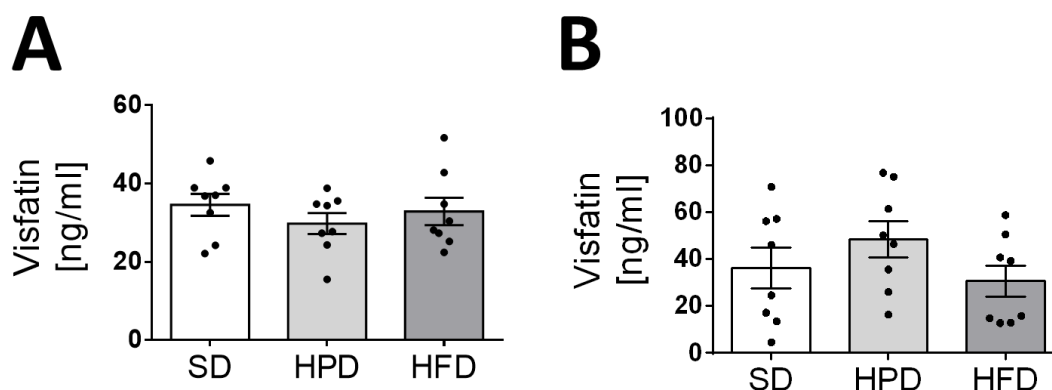

**Figure S1.** Effect of HPD and HFD on visfatin serum level after 60 (A) and 120 days (B) of diet treatment.
